# Supplementary material for: Nasal DNA methylation at three CpG sites predicts childhood allergic disease
Source: PubMed Central journal article supplement (PMC9715628; doi:10.1038/s41467-022-35088-6), 2022-12-01
Supplement: 41467_2022_35088_MOESM3_ESM.pdf [file 41467_2022_35088_MOESM3_ESM.pdf]

## **Description of Additional Supplementary Files**

**Supplementary Data 1.** eQTM analysis is performed using linear regression. Adjustment for multiple comparison is reflected in the use of false discovery rate (fdr)

**Supplementary Data 2.** SNP annotations are in the form <chromosome>.<position> and come from genome build hg19
